# Supplementary material for: Effect of silencing Bemisia tabaci TLR3 and TOB1 on fitness and begomovirus transmission
Source: Frontiers journal article supplement (doi:10.3389/fpls.2023.1136262), 2023-03-14
Supplement: Data_Sheet_1.PDF [file Data_Sheet_1.PDF]

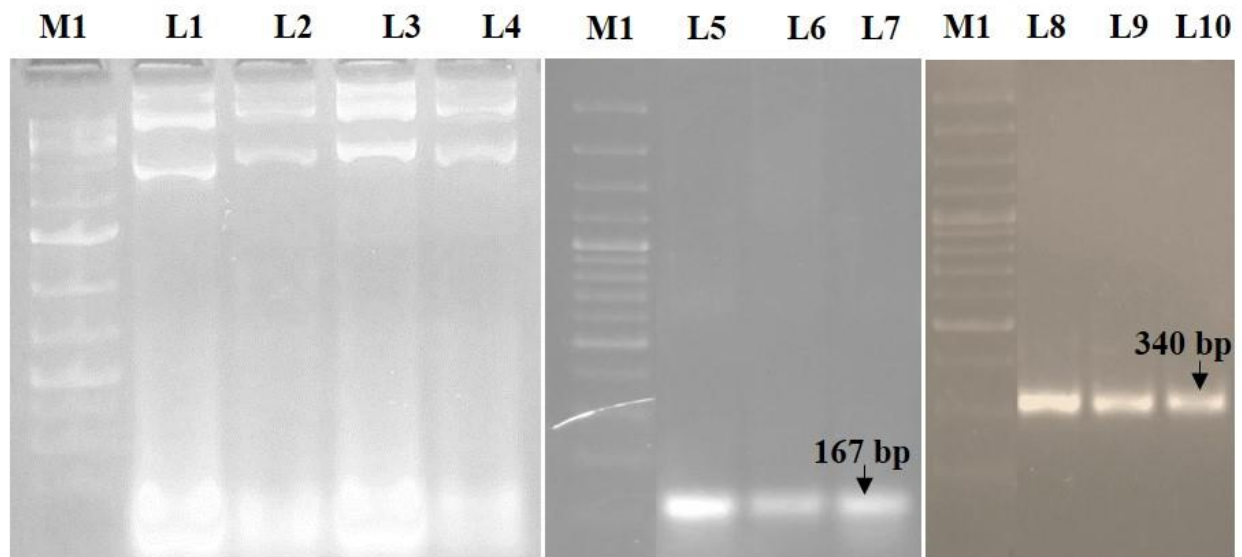

**Supplementary figure 1.** Synthesis of dsRNA targeting *B. tabaci* *TOB1* and *TLR3*. Total RNA isolated from recombinant *E. coli* HT115 cells (L1-L4, M1: 100 bp plus DNA ladder). Purified *TOB1* dsRNA (L5-L7) and *TLR3* dsRNA (L8-L10) purified from total RNA using DNase I and RNase A.
